# Supplementary material for: New Bioconjugated Technetium and Rhenium Folates Synthesized by Transmetallation Reaction with Zinc Derivatives
Source: MDPI journal article supplement (doi:10.3390/molecules26082373), 2021-04-19
Supplement: s1 [file s1]

# New Bioconjugated Technetium and Rhenium Folates synthesized by Transmetallation Reaction with Zinc Derivatives

Jordi Borràs <sup>1</sup>, Julie Foster <sup>2</sup>, Roxana Kashani <sup>2</sup>, Laura Melendez-Alafort <sup>3</sup>, Jane Sosabowski <sup>2</sup>,  
Joan Suades <sup>1,\*</sup> and Ramon Barnadas-Rodríguez <sup>4,\*</sup>

<sup>1</sup> Departament de Química, Edifici C, Universitat Autònoma de Barcelona, 08193 Cerdanyola del Vallès, Catalonia, Spain; jborrasamoraga@gmail.com (J.B.)

<sup>2</sup> Barts Cancer Institute, Queen Mary University of London, John Vane Science Centre, Charterhouse Square, London, United Kingdom; j.m.foster@qmul.ac.uk (J.F.); roxana.kashani@qmul.ac.uk (R.K.); j.k.sosabowski@qmul.ac.uk (Ja.S.)

<sup>3</sup> Istituto Oncologico Veneto IRCCS, 35128 Padova, Italy; laura.melendezalafort@iov.veneto.it

<sup>4</sup> Unitat de Biofísica/Centre d'Estudis en Biofísica, Facultat de Medicina, Departament de Bioquímica i Biologia Molecular, Universitat Autònoma de Barcelona. 08193 Cerdanyola del Vallès, Catalonia, Spain.

\* Correspondence: joan.suades@uab.cat (Jo.S.); ramon.barnadas@uab.cat (R.B.)

## CONTENTS

|                                                                                                             |     |
|-------------------------------------------------------------------------------------------------------------|-----|
| <b>Figure S1.</b> Spectroscopic data for <b>2<sub>(Zn)</sub></b> ( <sup>1</sup> H and <sup>13</sup> C NMR)  | S2  |
| <b>Figure S2.</b> Spectroscopic data for <b>2<sub>(Zn)</sub></b> (IR)                                       | S3  |
| <b>Figure S3.</b> Spectrometric data for <b>2<sub>(Zn)</sub></b> (HRMS)                                     | S4  |
| <b>Figure S4.</b> Spectroscopic data for <b>3<sub>(Zn)</sub></b> ( <sup>1</sup> H and <sup>13</sup> C NMR)  | S5  |
| <b>Figure S5.</b> Spectroscopic data for <b>3<sub>(Zn)</sub></b> (IR)                                       | S6  |
| <b>Figure S6.</b> Spectrometric data for <b>3<sub>(Zn)</sub></b> (HRMS)                                     | S7  |
| <b>Figure S7.</b> Spectroscopic data for <b>2<sub>(Re)</sub></b> ( <sup>1</sup> H and <sup>13</sup> C NMR)  | S8  |
| <b>Figure S8.</b> Spectroscopic data for <b>2<sub>(Re)</sub></b> ( <sup>31</sup> P)                         | S9  |
| <b>Figure S9.</b> Spectroscopic data for <b>2<sub>(Re)</sub></b> (IR)                                       | S9  |
| <b>Figure S10.</b> Spectrometric data for <b>2<sub>(Re)</sub></b> (HRMS)                                    | S10 |
| <b>Figure S11.</b> Spectroscopic data for <b>3<sub>(Re)</sub></b> ( <sup>1</sup> H and <sup>13</sup> C NMR) | S11 |
| <b>Figure S12.</b> Spectroscopic data for <b>3<sub>(Re)</sub></b> ( <sup>31</sup> P)                        | S12 |
| <b>Figure S13.</b> Spectroscopic data for <b>3<sub>(Re)</sub></b> (IR)                                      | S12 |
| <b>Figure S14.</b> Spectrometric data for <b>3<sub>(Re)</sub></b> (HRMS)                                    | S13 |

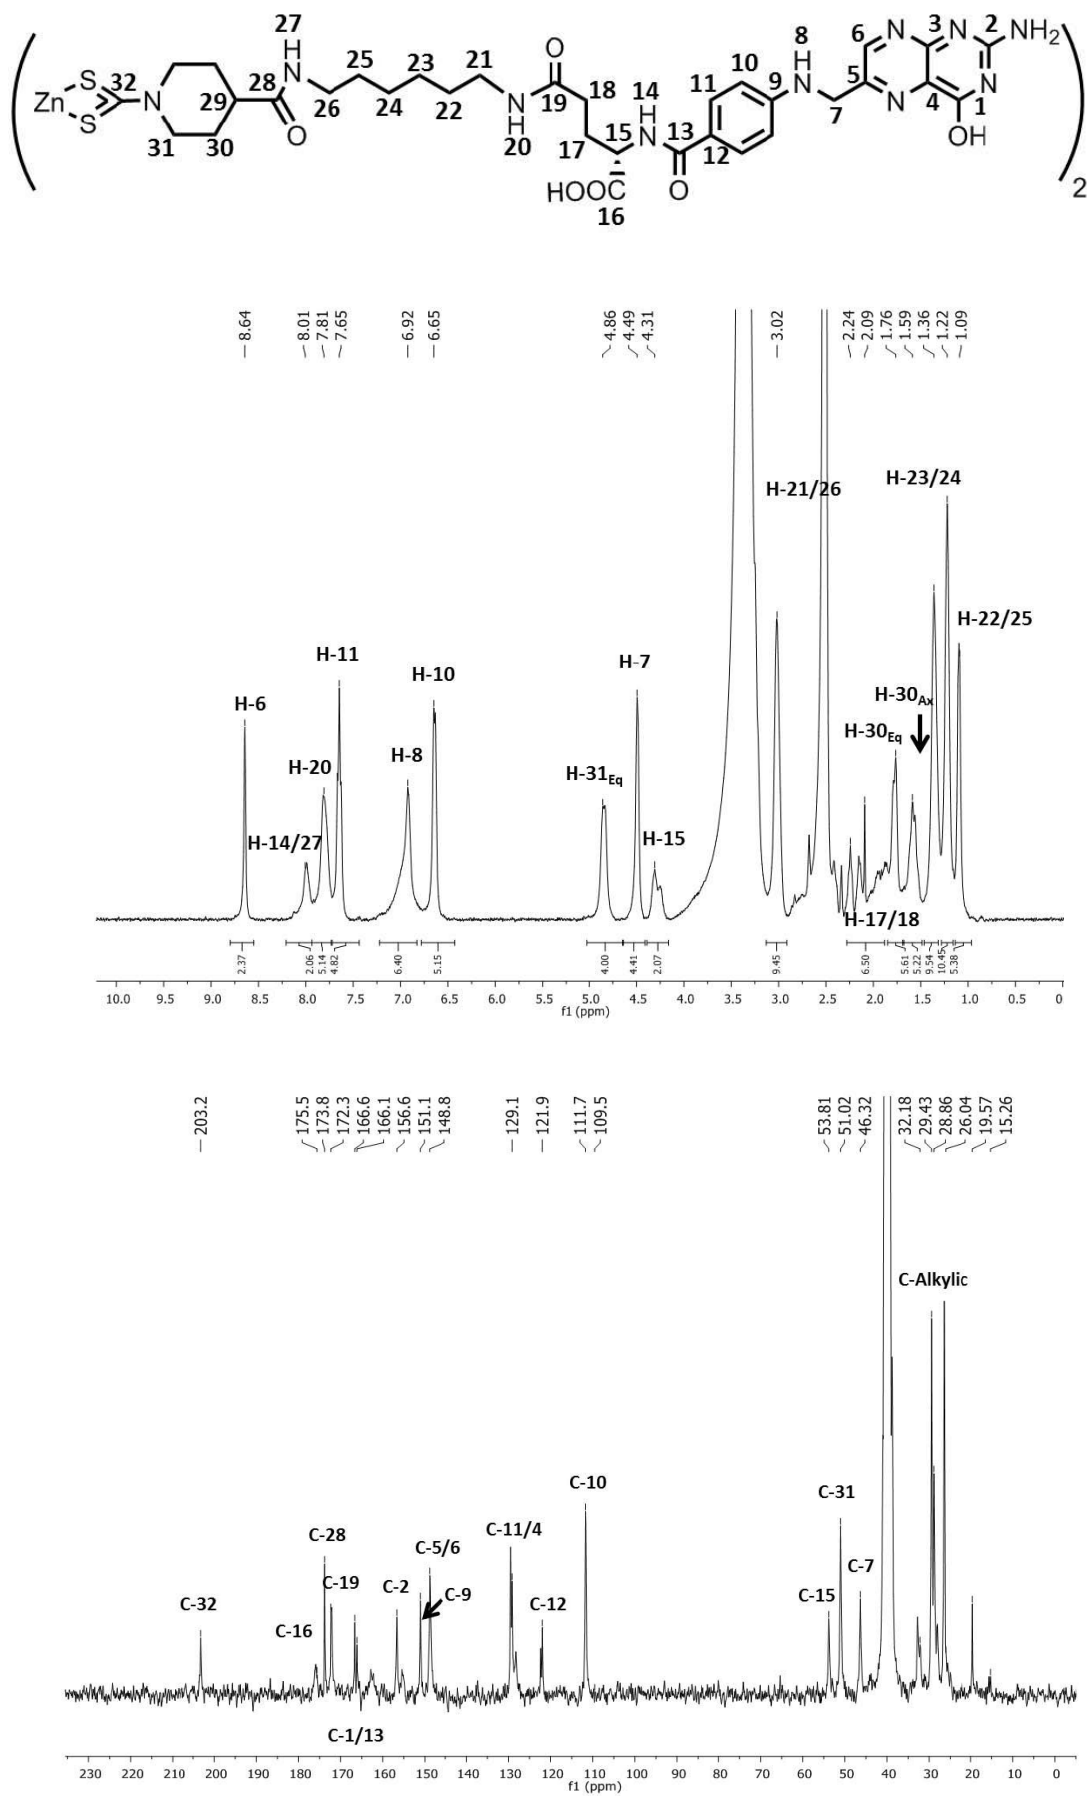

**Figure S1.** Spectroscopic data for **2**(Zn). <sup>1</sup>H NMR (top; d<sub>6</sub>-DMSO-400 MHz) and <sup>13</sup>C NMR (bottom; d<sub>6</sub>-DMSO-400 MHz).

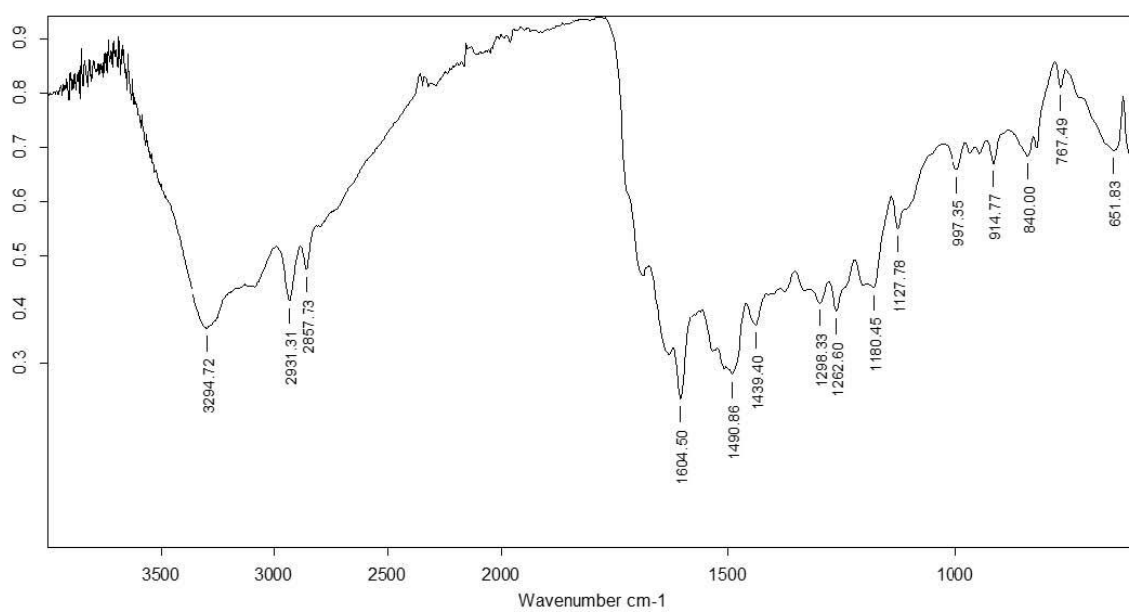

**Figure S2.** Spectroscopic data for **2<sub>(Zn)</sub>** (IR-ATR)

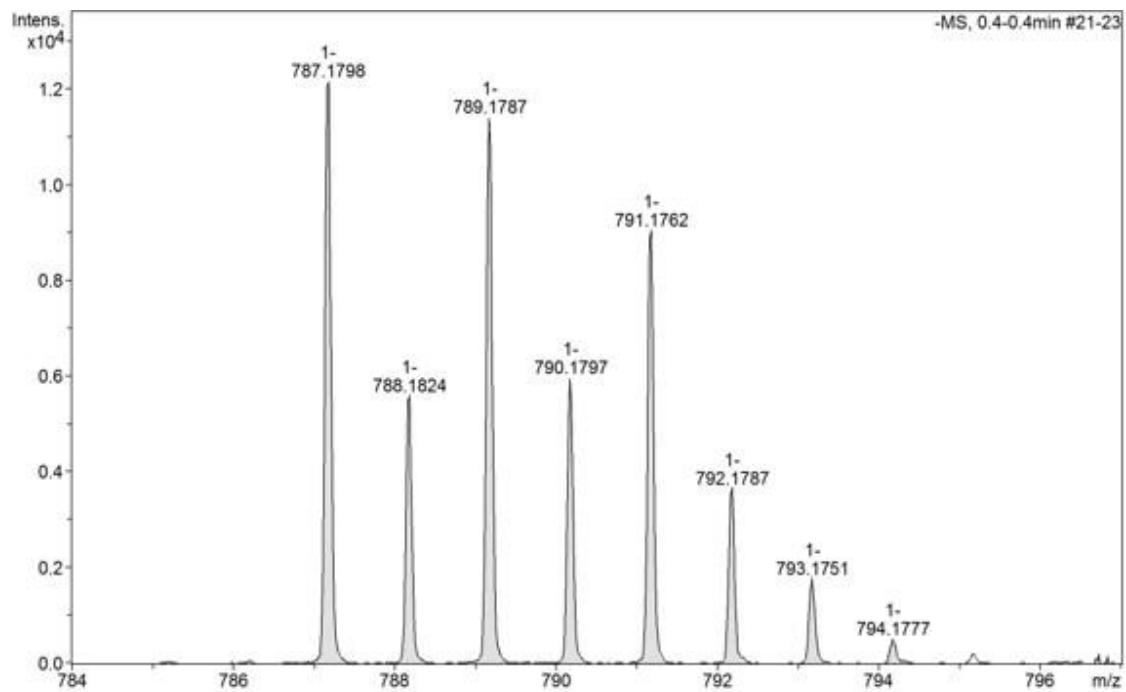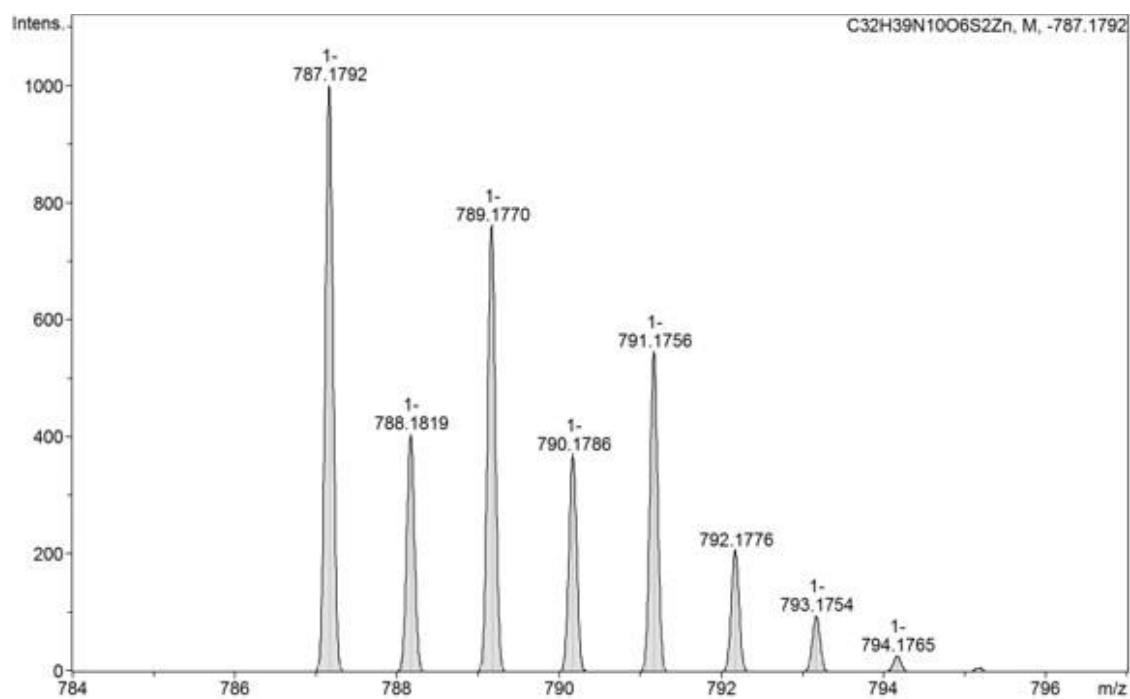

**Figure S3.** Spectrometric data for 2(zn) (HRMS). Experimental (top) and calculated (bottom) for [M]-L<sup>-</sup>-2H<sup>+</sup>.

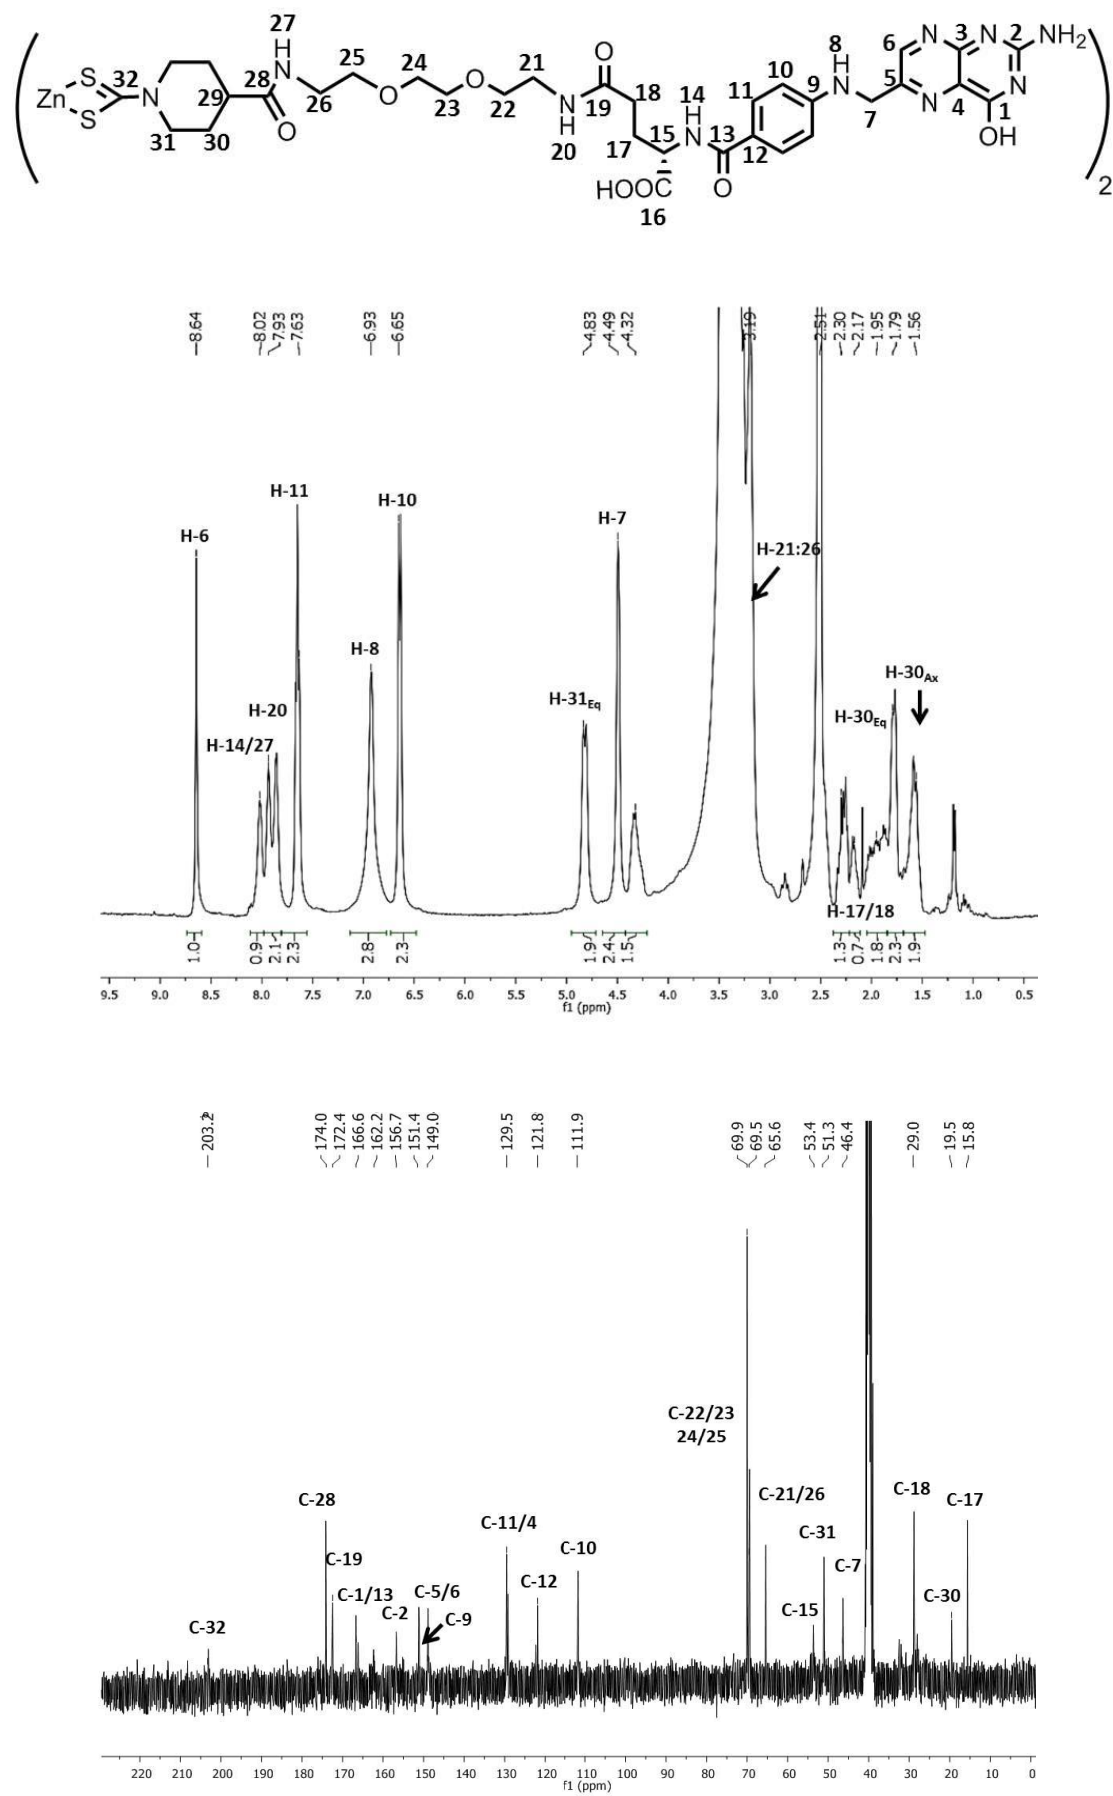

**Figure S4.** Spectroscopic data for **3**(Zn). <sup>1</sup>H NMR (top; d<sub>6</sub>-DMSO-400 MHz) and <sup>13</sup>C NMR (bottom; d<sub>6</sub>-DMSO-400 MHz).

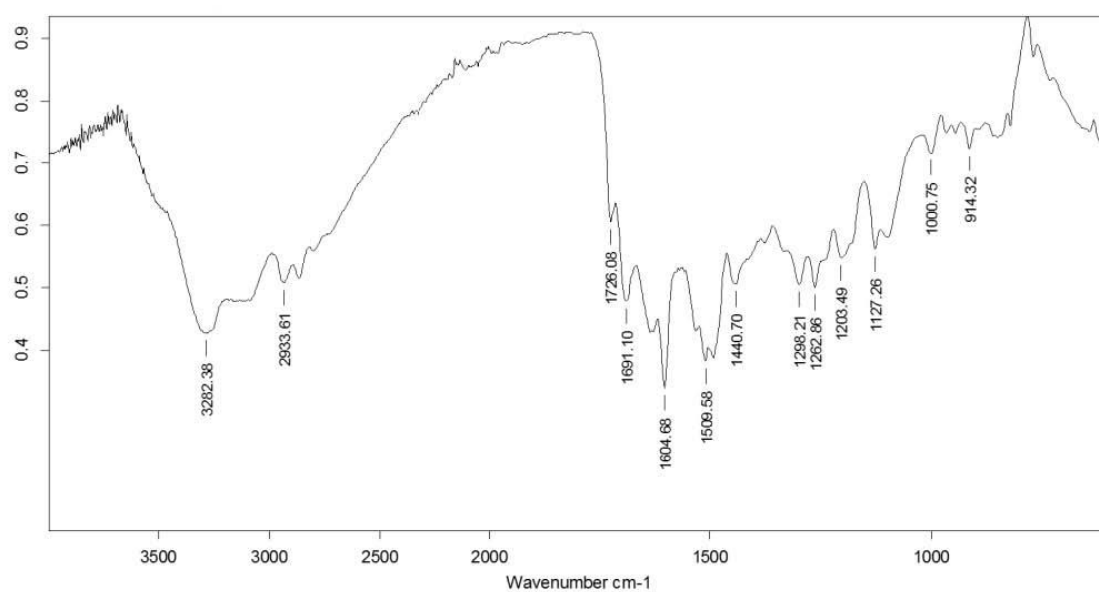

**Figure S5.** Spectroscopic data for 3<sub>(Zn)</sub> (IR-ATR)

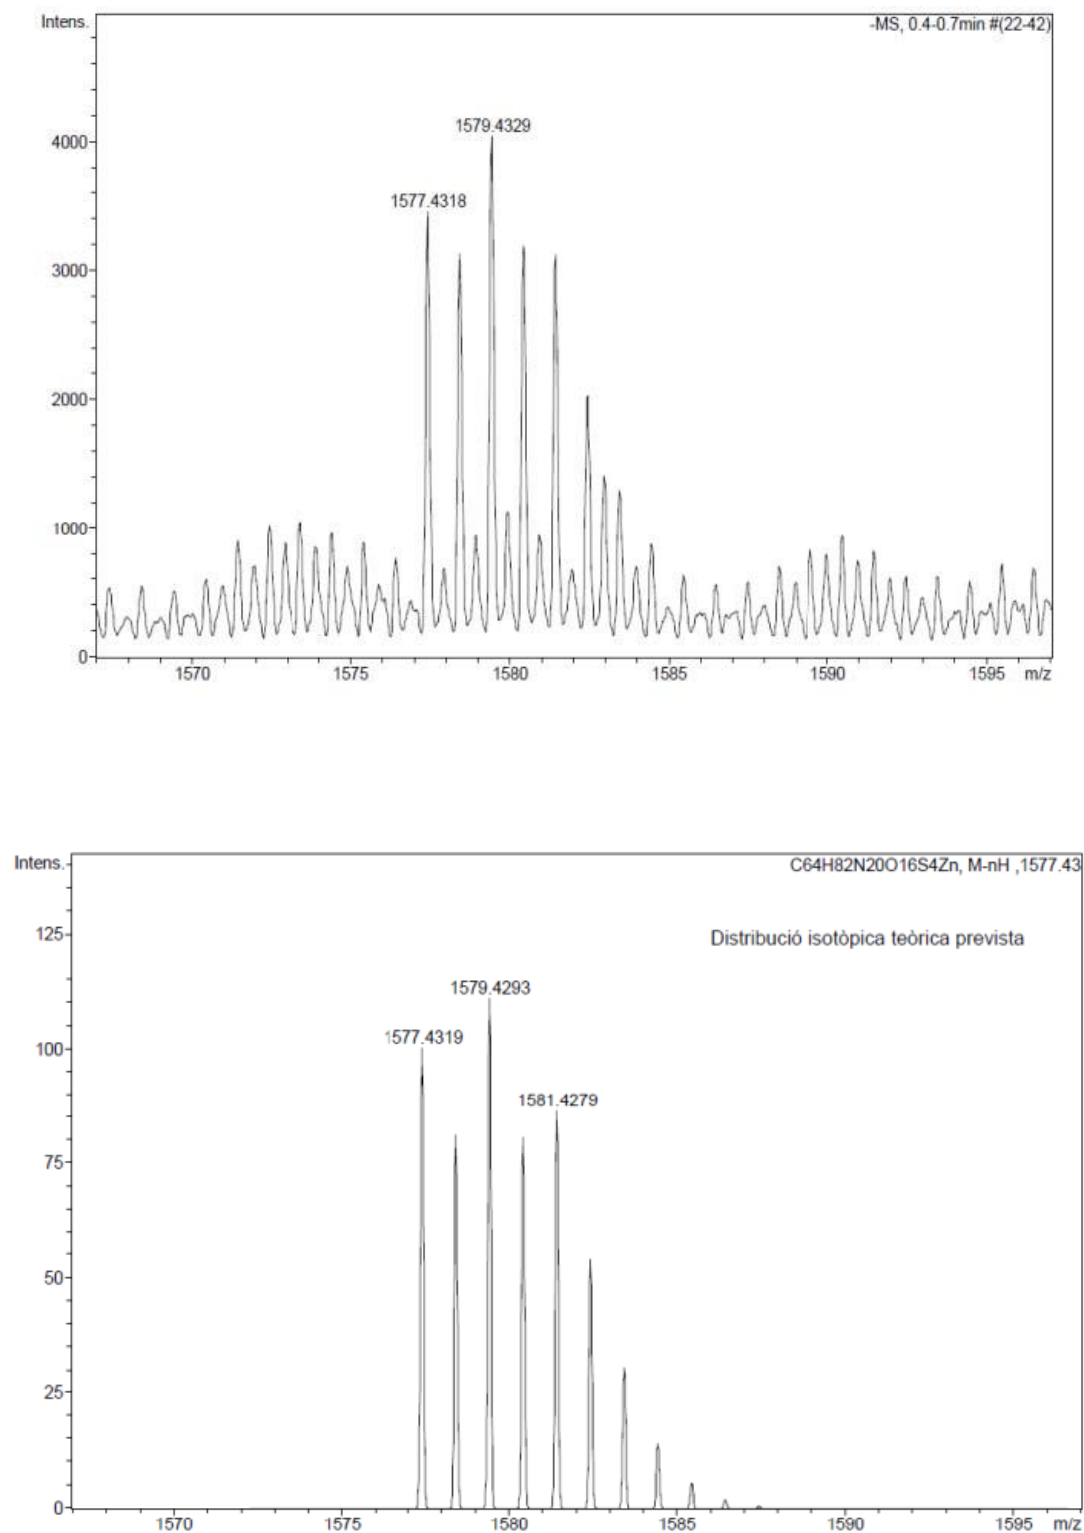

**Figure S6.** Spectrometric data for **3**<sub>(Zn)</sub> (HRMS). Experimental (top) and calculated (bottom) for [M]-H<sup>+</sup>.

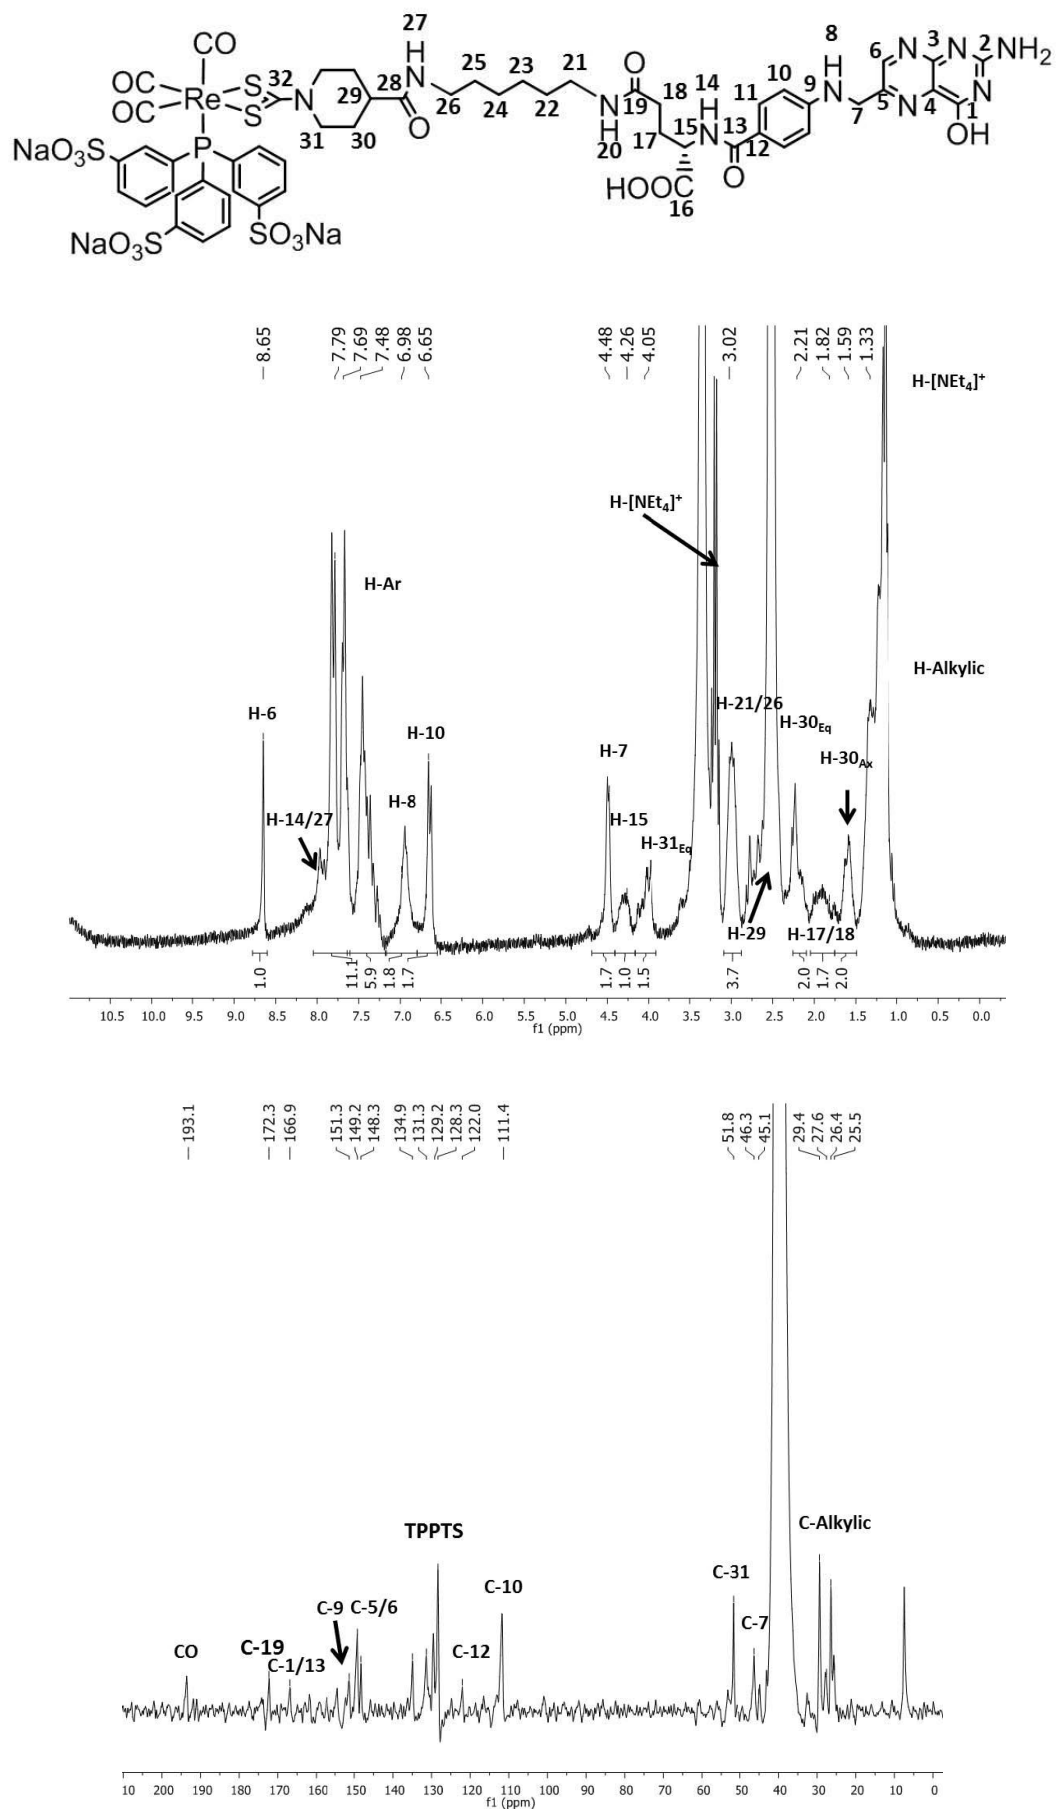

**Figure S7.** Spectroscopic data for **2(Re)**. <sup>1</sup>H NMR (top; d<sub>6</sub>-DMSO-250 MHz) and <sup>13</sup>C NMR (bottom; d<sub>6</sub>-DMSO-250 MHz).



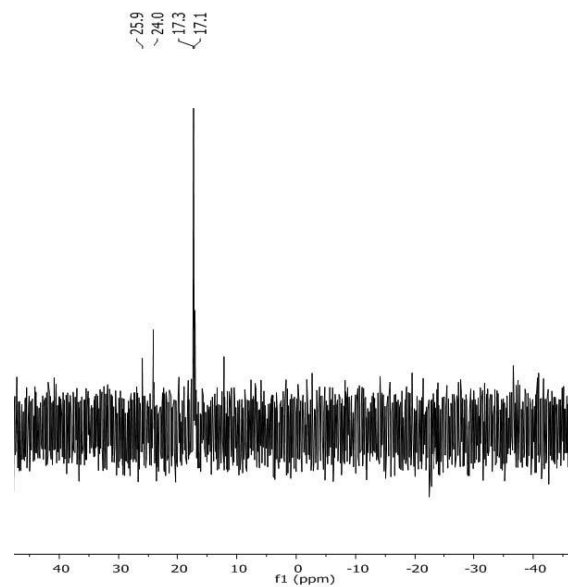

**Figure S8.** Spectroscopic data for **2<sub>(Re)</sub>**.  $^{31}\text{P}$  ( $\text{d}_6\text{-DMSO-250 MHz}$ ).

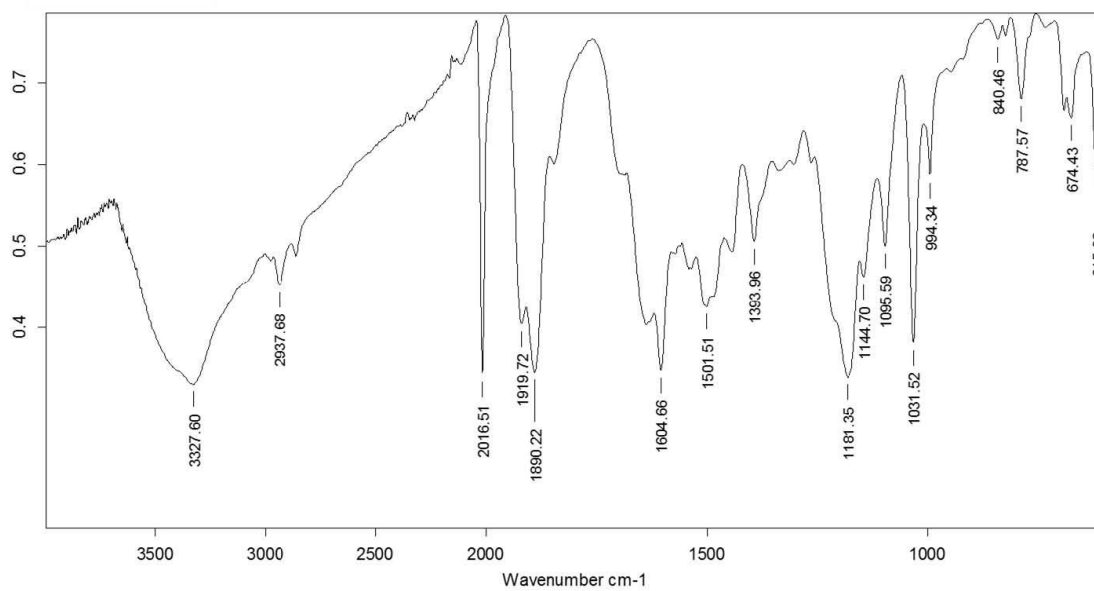

**Figure S9.** Spectroscopic data for **2<sub>(Re)</sub>** (IR-ATR)

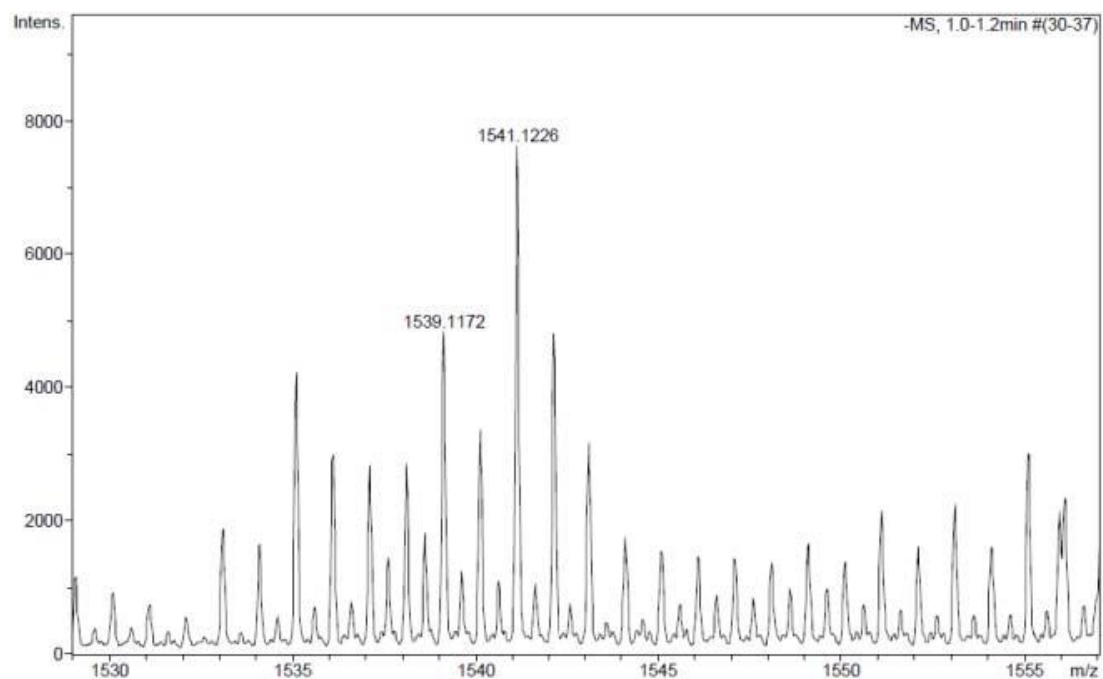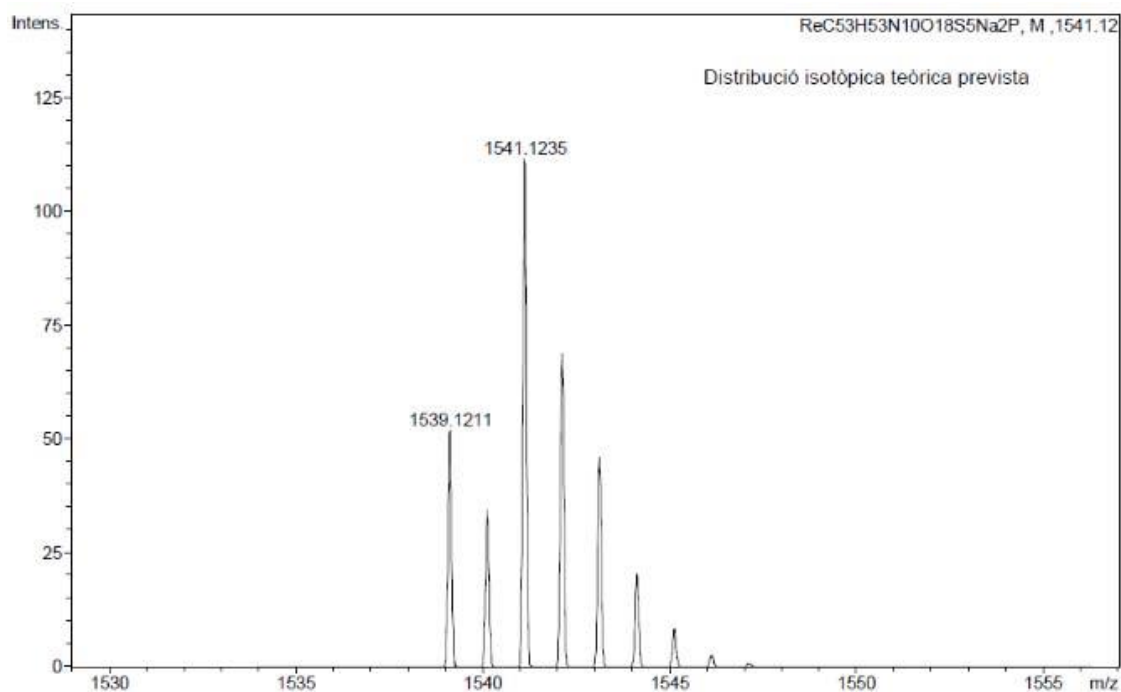

**Figure S10.** Spectrometric data for **2**<sub>(Re)</sub> (HRMS). Experimental (top) and calculated (bottom) for  $[M]-Na^+$ .

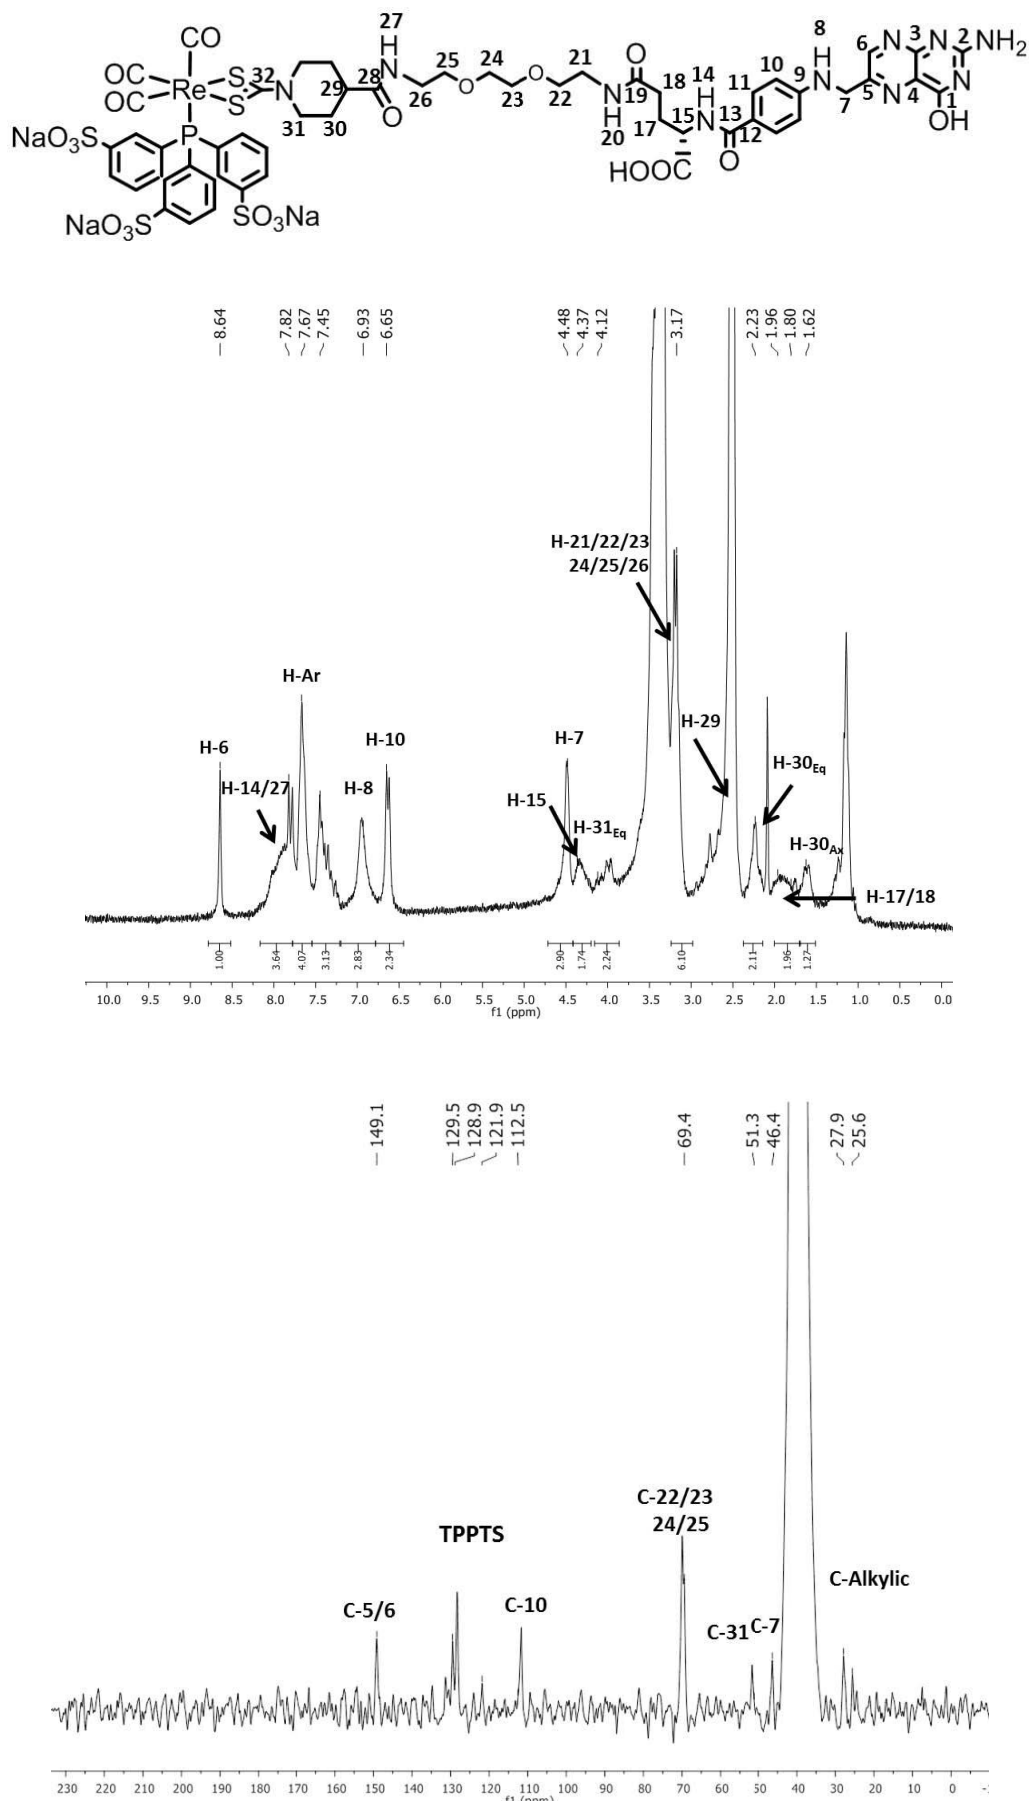

**Figure S11.** Spectroscopic data for **3(Re)**. <sup>1</sup>H NMR (top; d<sub>6</sub>-DMSO-250 MHz) and <sup>13</sup>C NMR (bottom; d<sub>6</sub>-DMSO-360 MHz).

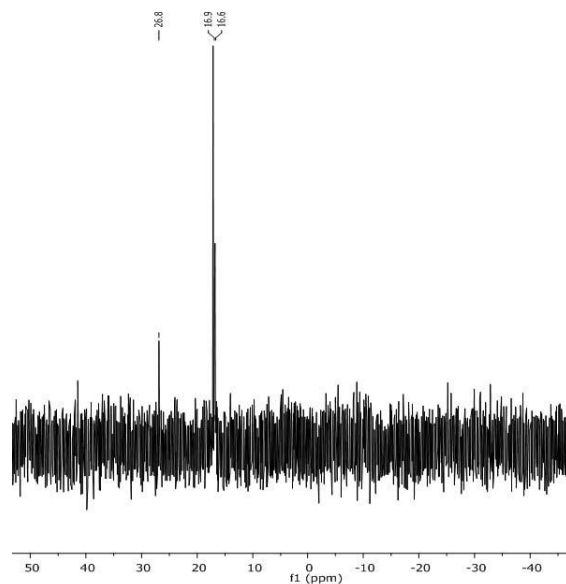

**Figure S12.** Spectroscopic data for **3(Re)**. <sup>31</sup>P (d<sub>6</sub>-DMSO-250 MHz).

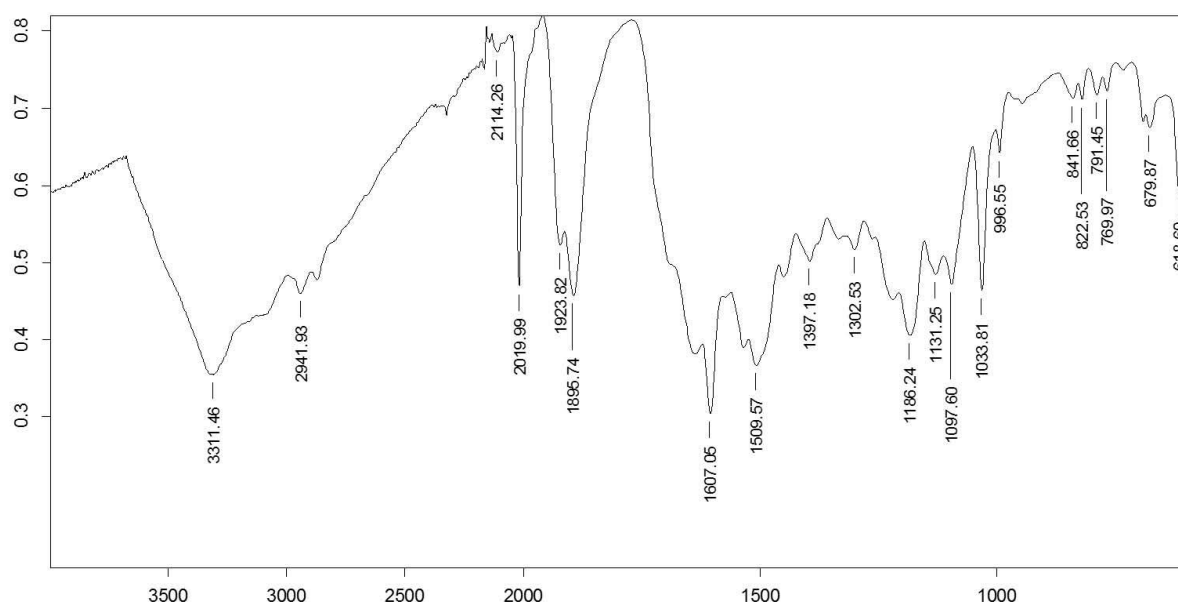

**Figure S13.** Spectroscopic data for **3(Re)** (IR-ATR).

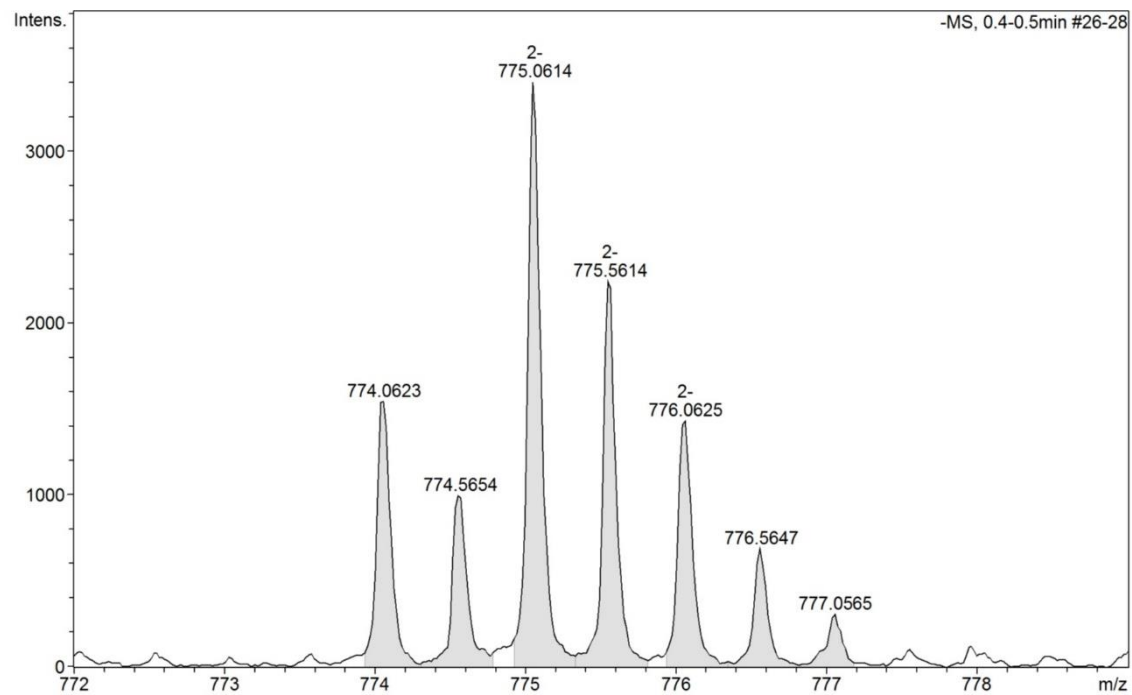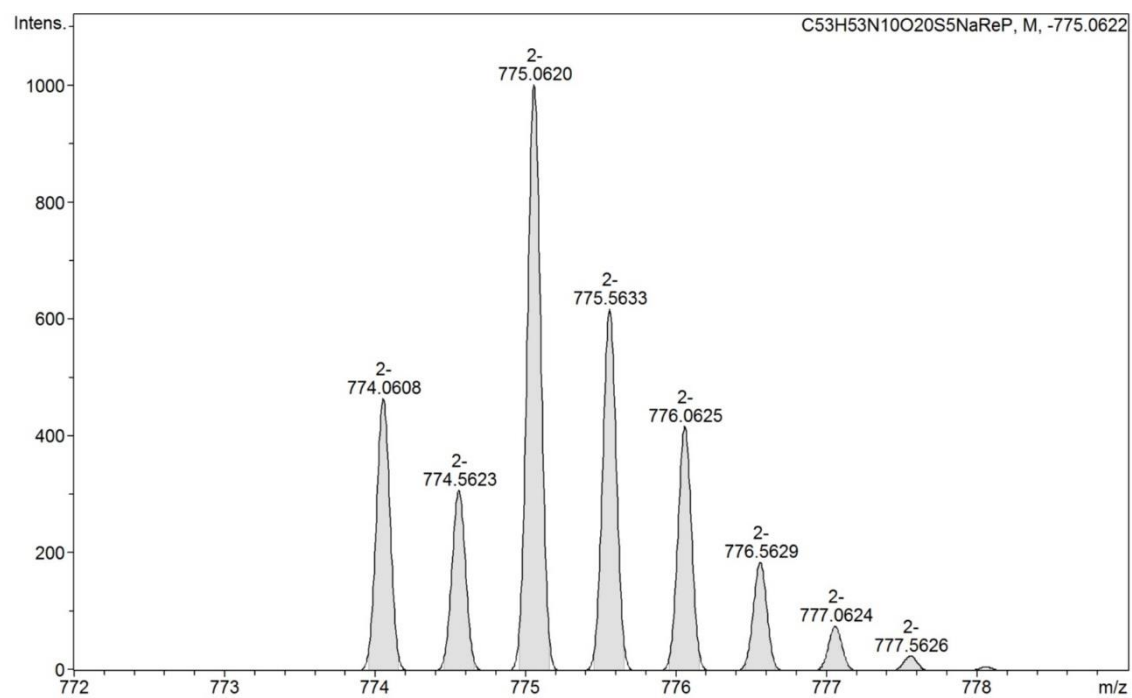

**Figure S14.** Spectrometric data for **3**<sub>(Re)</sub>. Experimental (top) and calculated (bottom) for [M]-2Na<sup>+</sup>.
